# Supplementary material for: Exploring the Link between Head and Neck Cancer and the Elevated Risk of Acute Myocardial Infarction: A National Population-Based Cohort Study
Source: MDPI journal article supplement (doi:10.3390/cancers16101930), 2024-05-18
Supplement: s1 [file s1]

**Supplementary Table S1.** Risk of an AMI event based on the time elapsed since the diagnosis of HNC.

| Time (Year) | AMI                       |                         |
|-------------|---------------------------|-------------------------|
|             | Unadjusted HR<br>(95% CI) | Adjusted HR<br>(95% CI) |
| 1           | 0.90 (0.20–4.19)          | 0.91 (0.20–4.22)        |
| 2           | 0.69 (0.20–2.34)          | 0.70 (0.21–2.37)        |
| 3           | 0.78 (0.30–2.02)          | 0.78 (0.30–2.03)        |
| 4           | 1.03 (0.48–2.24)          | 1.04 (0.48–2.25)        |
| 5           | 0.93 (0.43–1.99)          | 0.94 (0.44–2.01)        |
| 6           | 0.91 (0.44–1.87)          | 0.92 (0.45–1.88)        |
| 7           | 1.03 (0.53–1.98)          | 1.03 (0.53–1.99)        |
| 8           | 0.94 (0.49–1.80)          | 0.94 (0.49–1.81)        |
| 9           | 0.93 (0.50–1.73)          | 0.94 (0.51–1.76)        |
| 10          | 0.91 (0.49–1.70)          | 0.93 (0.50–1.73)        |

**Supplementary Table S2.** Incidence and risk of an AMI event according to the subtype of HNC.

| Variables          | N    | Case | Person-<br>years | Incidence<br>rate | Unadjusted HR<br>(95% CI) | Adjusted HR (95%<br>CI) |
|--------------------|------|------|------------------|-------------------|---------------------------|-------------------------|
| <b>Cancer type</b> |      |      |                  |                   |                           |                         |
| Comparison         | 2976 | 61   | 26002.8          | 2.35              | 1.00 (ref)                | 1.00 (ref)              |
| Oral cavity        | 525  | 9    | 4057.0           | 2.22              | 0.93 (0.46–1.87)          | 0.90 (0.45–1.82)        |
| Salivary gland     | 23   | 1    | 154.4            | 6.48              | 2.59 (0.36–18.67)         | 4.44 (0.58–33.72)       |
| Oropharynx         | 26   | 1    | 185.3            | 5.40              | 2.26 (0.31–16.32)         | 2.67 (0.37–19.48)       |
| Nasopharynx        | 39   | 0    | 236.8            | -                 | 0.00 (0–Inf)              | 0.00 (0–Inf)            |
| Hypopharynx        | 13   | 0    | 91.5             | -                 | 0.00 (0–Inf)              | 0.00 (0–Inf)            |
| Sinonasal tract    | 16   | 1    | 94.7             | 10.56             | 4.23 (0.59–30.57)         | 7.41 (0.98–56.10)       |
| Larynx             | 102  | 0    | 656.5            | -                 | 0.00 (0–Inf)              | 0.00 (0–Inf)            |

AMI, acute myocardial infarction; HNC, head and neck cancer; HR, hazard ratio; CI, confidence interval; Inf, infinite.
